# Supplementary material
Source: Springer Nature journal article supplement (https://www.springermedizin.de/resource/supplementary/12885_2013_4486_MOESM11_ESM.pdf/9466472)

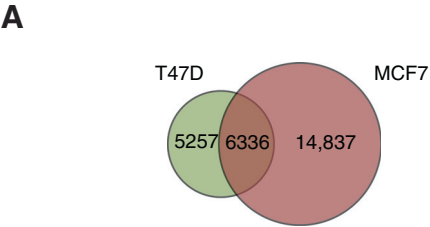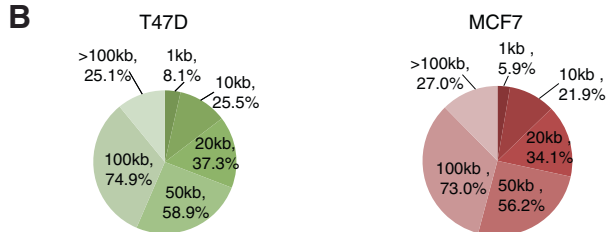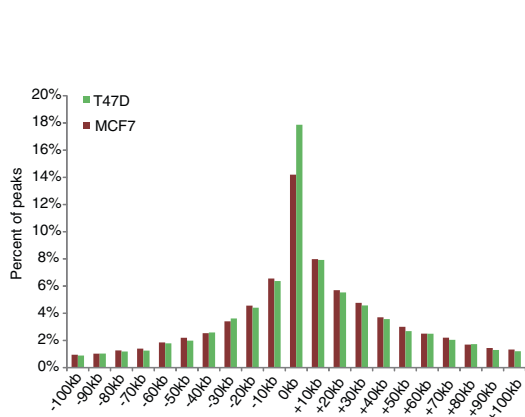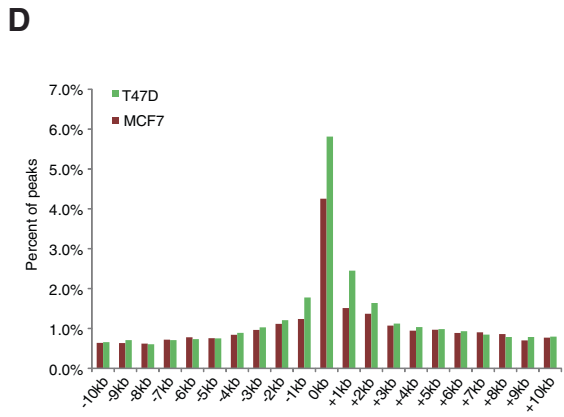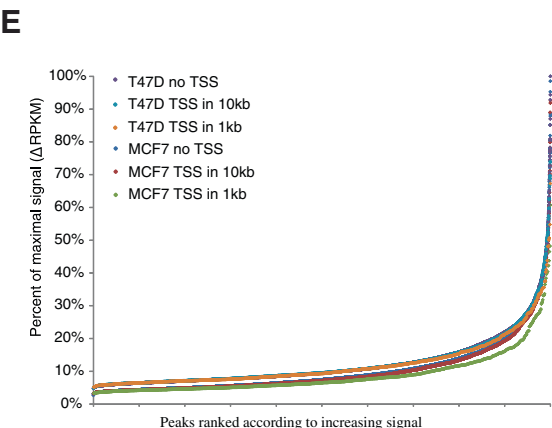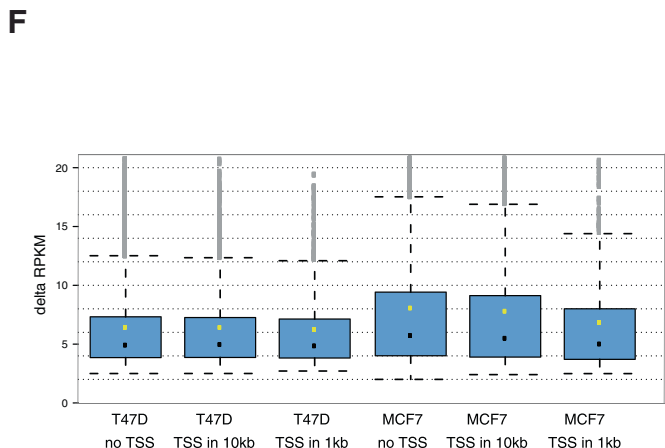

Supplement: MOESM11 [file 9466472]
